# Supplementary material for: Glacial and geomorphic effects of a supraglacial lake drainage and outburst event, Everest region, Nepal Himalaya
Source: Copernicus journal article supplement (doi:10.5194/tc-12-3891-2018), 2018-12-13
Supplement: Supplementary file 1 [file tc-12-3891-2018-supplement.pdf]

Supplement of The Cryosphere, 12, 3891–3905, 2018  
<https://doi.org/10.5194/tc-12-3891-2018-supplement>  
© Author(s) 2018. This work is distributed under  
the Creative Commons Attribution 4.0 License.

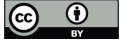

*Supplement of*

## **Glacial and geomorphic effects of a supraglacial lake drainage and outburst event, Everest region, Nepal Himalaya**

**Evan S. Miles et al.**

*Correspondence to:* Evan S. Miles ([evan.miles@wsl.ch](mailto:evan.miles@wsl.ch))

The copyright of individual parts of the supplement might differ from the CC BY 4.0 License.

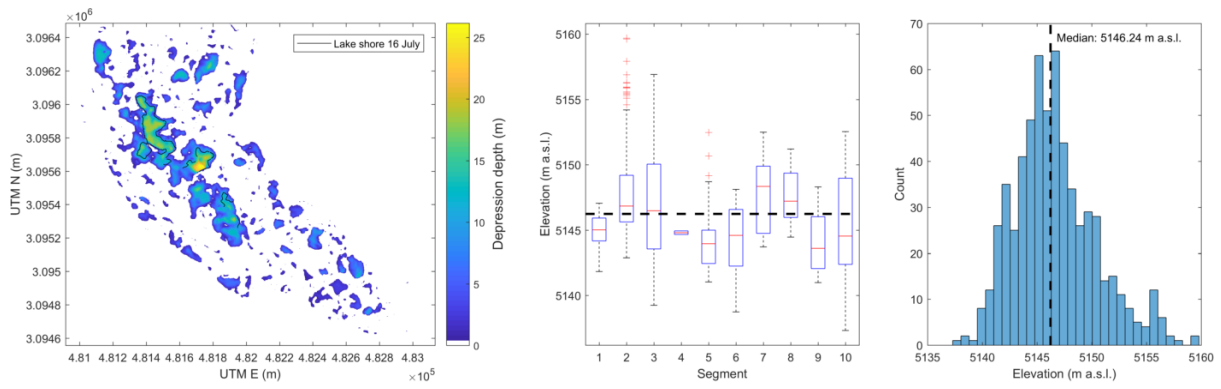

Figure S1. Changri Shar surface depression depths, also indicating the observable lake shoreline not obscured by cloud-cover (left). Boxplots of elevation sampled from the March 2017 Pléiades DEM within 3 m of each segment of the observed shoreline (center). Histogram of all elevation measurements in proximity to the observed shoreline (right).

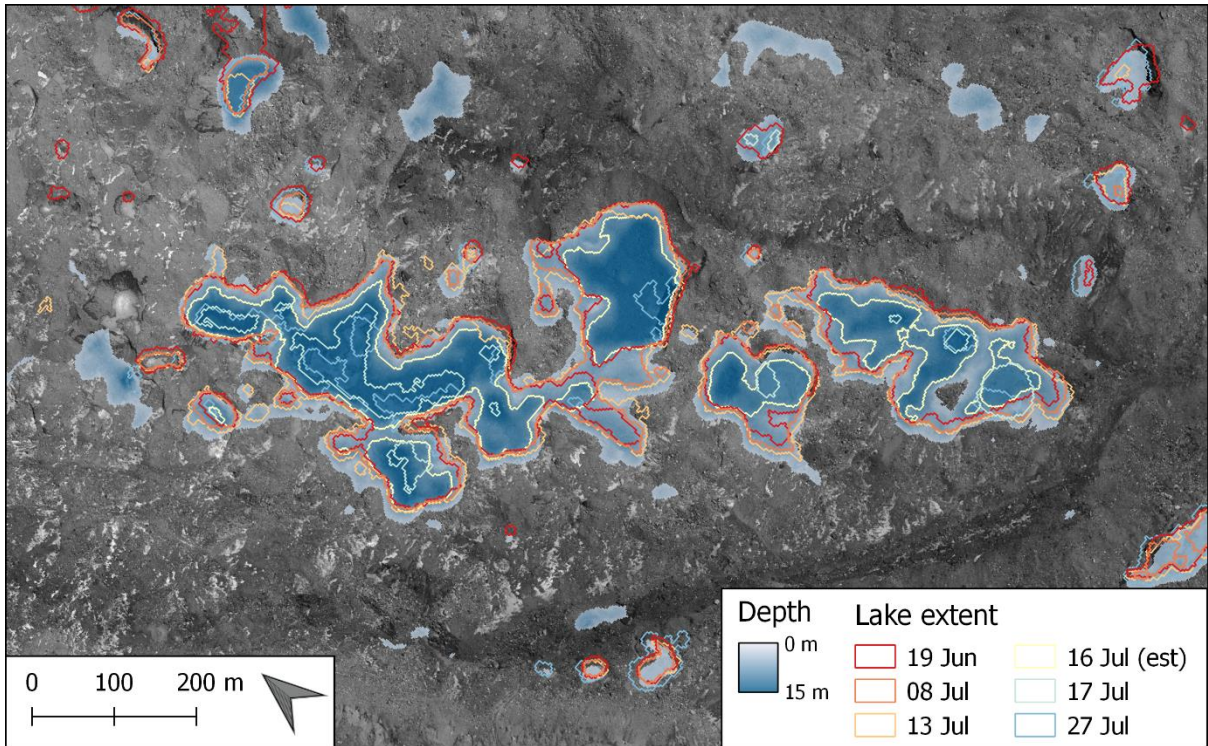

Figure S2. Comparison of surface depressions and lake outlines associated with the filling and drainage, including the estimated lake outline for 16 July based on the median shoreline elevation.

Table S1. Acquisition dates and characteristics of satellite imagery used in the study. \*Pléiades acquires imagery in 5 bands (Pan/B/G/ R/NIR), but we use only the panchromatic data in this study.

| Date      | Sensor      | Bands            | Purpose                   | Resolution (m) |
|-----------|-------------|------------------|---------------------------|----------------|
| 09-Nov-16 | PlanetScope | 4: B/G/R/NIR     | Lake monitoring           | 3              |
| 27-Mar-17 | PlanetScope | 4: B/G/R/NIR     | Lake monitoring           | 3              |
| 31-Mar-17 | PlanetScope | 4: B/G/R/NIR     | Lake monitoring           | 3              |
| 08-Apr-17 | PlanetScope | 4: B/G/R/NIR     | Lake monitoring           | 3              |
| 18-Apr-17 | PlanetScope | 4: B/G/R/NIR     | Lake monitoring           | 3              |
| 03-May-17 | PlanetScope | 4: B/G/R/NIR     | Lake monitoring           | 3              |
| 08-May-17 | PlanetScope | 4: B/G/R/NIR     | Lake monitoring           | 3              |
| 17-May-17 | PlanetScope | 4: B/G/R/NIR     | Lake monitoring           | 3              |
| 18-May-17 | RapidEye    | 5: B/G/R/RE/NIR  | Lake monitoring           | 5              |
| 28-May-17 | PlanetScope | 4: B/G/R/NIR     | Lake monitoring           | 3              |
| 02-Jun-17 | PlanetScope | 4: B/G/R/NIR     | Lake monitoring           | 3              |
| 03-Jun-17 | PlanetScope | 4: B/G/R/NIR     | Lake monitoring           | 3              |
| 04-Jun-17 | PlanetScope | 4: B/G/R/NIR     | Lake monitoring           | 3              |
| 09-Jun-17 | PlanetScope | 4: B/G/R/NIR     | Lake monitoring           | 3              |
| 17-Jun-17 | PlanetScope | 4: B/G/R/NIR     | Lake monitoring           | 3              |
| 19-Jun-17 | PlanetScope | 4: B/G/R/NIR     | Lake monitoring           | 3              |
| 25-Jun-17 | PlanetScope | 4: B/G/R/NIR     | Lake monitoring           | 3              |
| 26-Jun-17 | PlanetScope | 4: B/G/R/NIR     | Lake monitoring           | 3              |
| 07-Jul-17 | PlanetScope | 4: B/G/R/NIR     | Lake monitoring           | 3              |
| 08-Jul-17 | PlanetScope | 4: B/G/R/NIR     | Lake monitoring           | 3              |
| 13-Jul-17 | PlanetScope | 4: B/G/R/NIR     | Lake monitoring           | 3              |
| 16-Jul-17 | PlanetScope | 4: B/G/R/NIR     | Lake monitoring           | 3              |
| 17-Jul-17 | PlanetScope | 4: B/G/R/NIR     | Lake monitoring           | 3              |
| 19-Jul-17 | PlanetScope | 4: B/G/R/NIR     | Lake monitoring           | 3              |
| 27-Jul-17 | PlanetScope | 4: B/G/R/NIR     | Lake monitoring           | 3              |
| 05-Sep-17 | PlanetScope | 4: B/G/R/NIR     | Lake monitoring           | 3              |
| 16-Oct-17 | PlanetScope | 4: B/G/R/NIR     | Lake monitoring           | 3              |
| 23-Mar-17 | Pléiades    | 1*: Panchromatic | DEM generation            | 0.7            |
| 14-Dec-17 | Pléiades    | 1*: Panchromatic | DEM generation            | 0.7            |
| 30-Nov-12 | RapidEye    | 5: B/G/R/RE/NIR  | Proglacial stream erosion | 5              |
| 20-Nov-15 | RapidEye    | 5: B/G/R/RE/NIR  | Proglacial stream erosion | 5              |
| 17-Nov-16 | RapidEye    | 5: B/G/R/RE/NIR  | Proglacial stream erosion | 5              |
| 13-Nov-17 | RapidEye    | 5: B/G/R/RE/NIR  | Proglacial stream erosion | 5              |
